# Supplementary material
Source: PubMed Central journal article supplement (PMC10592686)
Supplement: NIHMS1896258-supplement-Supplemental_Digital_Content_2.pdf [file NIHMS1896258-supplement-Supplemental_Digital_Content_2.pdf]

**Targeting Serine-Arginine Protein Kinase 2 Ameliorates Alcohol-Associated Liver Disease by Alternative Splicing Control of Lipogenesis**

Guannan Li<sup>1,2</sup>, Hanqing Chen<sup>1,2</sup>, Feng Shen<sup>1,2</sup>, Steven Blake Smithson<sup>1,2</sup>, Gavyn Lee Shealy<sup>1,2</sup>, Qinggong Ping<sup>1,2</sup>, Zerong Liang<sup>1,2</sup>, Jingyan Han<sup>3</sup>, Andrew C. Adams<sup>4</sup>, Yu Li<sup>5</sup>, Dechun Feng<sup>6</sup>, Bin Gao<sup>6</sup>, Masahiro Morita<sup>1,2</sup>, Xianlin Han<sup>1</sup>, Tim H Huang<sup>2</sup>, Nicolas Musi<sup>1,7</sup>, Mengwei Zang<sup>1,2,7\*</sup>

**Animal Model for Chronic-Plus-Binge Alcohol Feeding**—The Bin-binge mouse model of ALD was developed as described previously (1, 2). This pre-clinical mouse model of chronic-plus-binge alcohol feeding, which mimics drinking patterns and liver pathological changes seen in humans with ALD, such as steatosis and inflammation (1), was used. Male and female mice at 3-5 months of age were acclimated on a control liquid diet (Bio-Serv, Cat#F1259SP, Frenchtown, NJ, USA) for 5 days. The mice were fed a Lieber-DeCarli ethanol diet *ad libitum* (Bio-Serv, Cat#F1258SP, Frenchtown, NJ, USA, ethanol content: 5%) or subjected to a pair-fed control diet. After 10 days of ethanol feeding, mice were gavaged with a single dose of ethanol binge (5 g/kg body weight) in the early morning of the last day. Meanwhile, pair-fed mice with a control liquid diet were gavaged with an isocaloric maltose dextrin solution. All mice were sacrificed 9 hours post-gavage. During this period, both control mice and alcohol-fed mice had free access to the original liquid diet feeding tubes.

All mice were housed in a temperature-controlled environment with a 12-h light/dark cycle. All animal experiments were approved by the Institutional Animal Care and Use Committee (IACUC) at the University of Texas Health San Antonio (UTHSA).

**Animal Models with FGF21 Gain-of-function and Loss-of-function Strategies**—We used an FGF21 transgenic mouse model (FGF21-Tg), in which human FGF21 was predominantly overexpressed in the liver under the control of the human *ApoE* promoter including its hepatic control region(3). As a result, FGF21-Tg mice exhibited elevated plasma concentrations of FGF-21 (70-150 ng/ml) (3). We also used a genetically engineered FGF21 knockout (FGF21 KO) mouse model, as previously described (4). These mice were provided by Eli Lilly and Company, Indianapolis, Indiana. After 5 days of acclimation on a control liquid diet, these mice were subjected to either a Lieber-DeCaril alcohol liquid diet for 10 days, along with one dose of alcohol binge feeding, or a pair-fed control diet plus one dose of an isocaloric maltose dextrin solution at the end of experiments.

**In Vivo Adenoviral Gene Transfer**—Adenovirus-mediated gene transfer was performed in livers of mice through tail vein injection as described previously(2, 5). To determine the *in vivo* effect of hepatic SRPK2 knockdown, an adenovirus expressing short hairpin RNA targeting SRPK2 (shSRPK2) was purchased from Vector BioLabs (PA, USA). The target sequence for the designed mouse SRPK2 shRNA is GCAGAGAGTGATTACACGTAT. The adenovirus encoding shRNA SRPK2 ( $1 \times 10^9 \sim 5 \times 10^9$  pfu) was administered by tail vein injection into mice using a 0.1-ml syringe with a 29.5-gauge needle on the last day of acclimation. Control mice received the injection with an adenovirus expressing scramble shRNA. At 24 h post-injection, these mice were subjected to a Lieber-DeCaril alcohol liquid diet for 10 days, followed by one dose of alcohol binge feeding at the end of experiments.

**Isolation of Primary Mouse Hepatocytes**—Primary mouse hepatocytes were isolated using a modified protocol from previous studies(6). After young C57BL/6 mice were anesthetized using isoflurane, the portal vein was cannulated with a 24G IV catheter. Subsequently, the liver was

perfused with 50 mL of PBS (no Calcium) with 0.5 mM EGTA (ethylene glycol-bis ( $\beta$ -aminoethyl ether)-N,N,N',N'-tetraacetic acid). After that, the liver was perfused with a collagenase buffer (66.7 mM NaCl, 6.7 mM KCl, 6.3 mM CaCl<sub>2</sub>, 0.05% collagenase type 2, 0.226 mM BSA, 100 mM HEPES, pH 7.4) containing collagenase type 2 (Worthington Biochemical Corporation, NJ, USA) for 3-5 mins. Once collagenase digestion was completed, the liver was removed and transferred to a 100 mm petri dish, and hepatocytes were released and filtered through 100 and 40  $\mu$ m nylon mesh cell strainers. The hepatocytes were washed and centrifuged at 50 g at 4°C for 3 mins. After centrifugation, the cell pellet was washed three times and resuspended with DMEM containing 10% FBS. Cell number and viability were determined by Trypan Blue staining. The cells were grown and maintained in a humidified chamber with 5% CO<sub>2</sub> at 37°C.

**Primary Hepatocyte Treatment and Adenoviral transduction**—Isolated primary mouse hepatocytes were seeded in 6-well plates and cultured in DMEM (Gibco, 4.5 g/L D-glucose, MA, USA) supplemented with 10% FBS and 1% penicillin/streptomycin for 4 h, and then cultured in DMEM medium containing 2% FBS overnight. For ethanol treatment, primary hepatocytes were incubated for 24 h with increasing concentrations of ethanol (50-100 mM) in medium containing 2% FBS. For adenovirus-mediated overexpression, an adenovirus from Vector BioLabs (Malvern, PA, USA) was used. To examine the effect of overexpressing SRPK2, primary mouse hepatocytes were cultured overnight in a 6-well plate, and then transduced for 24 hours with an adenovirus carrying the full-length mouse SRPK2 in medium containing 2% FBS at varying multiplicities of infection (MOI) of 1-5, as previously described (7-10). As a control group, cells were transduced for 24 h with Ad-GFP at an MOI of 5 in the medium containing 2% FBS.

**AML12 Hepatocyte Treatment and Adenoviral Transduction**—The alpha mouse liver 12 (AML12) hepatocytes purchased from American Type Culture Collection were cultured in 1:1 mixture of DMEM (Gibco, 4.5 g/L D-glucose, MA, USA ) and Ham's F12 medium (Hyclone, UT, USA ) supplemented with 10% fetal bovine serum (FBS, Invitrogen, MA, USA), 40 ng/mL Dexamethasone, 0.005 mg/mL transferrin (Invitrogen, MA, USA), 5 ng/mL selenium, and 1% penicillin/streptomycin (Invitrogen, MA, USA) as described previously (2). The cells were grown and maintained in a humidified chamber with 5% CO<sub>2</sub> at 37°C. For ethanol treatment, cells were seeded in 6-well plates and cultured overnight to reach ~80% confluence, and then incubated for 24 h with increasing concentrations of ethanol (25-100 mM) in medium containing 2% FBS. For overexpression or knockdown of SRPK2 in AML12 hepatocytes, adenoviruses from Vector BioLabs (Malvern, PA, USA) were used. AML12 hepatocytes were seeded and cultured overnight. Adenovirus expressing full-length mouse SRPK2, adenovirus encoding shRNA SRPK2, or control adenoviruses were added into serum-free medium, and AML12 cells were cultured for 6-8 h. Subsequently, AML12 cells were incubated in medium containing 10% FBS, and cells were harvested 48 h post-transduction. Adenovirus-mediated overexpression of FGF21 was also performed in the same method. If ethanol treatment was involved in adenovirus-mediated transduction, AML12 cells were transduced with adenovirus vectors for 24 h, and then incubated with or without ethanol (100 mM) in medium containing 2% FBS for an additional 24 h. For treatments with cycloheximide (CHX) or rapamycin, AML12 cells were seeded in 6-well or 12-well plates and cultured overnight to reach ~80% confluence. The cells were then incubated with CHX (50  $\mu$ g/ml) in the absence or presence of rapamycin (20 nM) for the duration specified in the figure legends.

**Hepatic Lipids Extraction and Measurement**—Hepatic lipids were extracted using chloroform and methanol (1:1) solution. First, 20 mg of liver tissue samples were homogenized in 2 mL of PBS buffer. The homogenates were transferred to clear glass tubes (BD Vacutainer, NJ, USA) and centrifuged at 13,000 rpm to remove cell debris. Second, the supernatant was mixed with 4 mL of a chloroform: methanol solution (PBS: chloroform: methanol = 1:1:1), and vigorously

vortexed for 30s. Then the mixture solution was centrifuged at 3,000 rpm at 4°C for 10 min to allow for separation into two phases. The lipid extracts were condensed in the chloroform layer at the bottom of the tube and were carefully transferred to a new glass tube. An aliquot of the organic solvent phase was evaporated under nitrogen gas to dry chloroform and prevent oxidation of lipids. Finally, after chloroform was totally dried, lipids were re-dissolved in isopropanol with 1% Triton X-100. To assay lipid concentrations, 3 µl of triglyceride standard or 3 µl of liver lipid extract were added to a 96-well flat-bottom polystyrene plate, and 300 µl of Infinity triglyceride or cholesterol reagents were added to the microplate. Measurement of lipid content was performed using Infinity™ Triglycerides and Cholesterol (Thermo SCIENTIFIC, Cat# TR22421 and Cat# TR13421, MA, USA) according to manufacturer's instructions. The optical density was measured at 515 nm using the Spectramax M5 Microplate Reader (Molecular Devices, Sunnyvale, CA, USA). Hepatic lipid concentrations were normalized to liver tissue weight and expressed as mg of lipid/g of liver tissue.

**Measurement of Plasma Triglyceride and Cholesterol levels**—Measurement of plasma triglyceride and cholesterol content was performed using Infinity™ Triglycerides and Cholesterol (Thermo SCIENTIFIC, Cat# TR22421 and Cat# TR13421, MA, USA) according to manufacturer's instructions.

**Measurement of Plasma Alanine Aminotransferase (ALT) Levels**—Measurement of plasma ALT levels was performed with ALT assays using Liquid ALT Reagent Set (POINTE SCIENTIFIC, Cat#A7526-150, MI, USA) according to manufacturer's instructions. A ratio of plasma sample: reagent (1:10) was used, and reagents were pre-warmed at 37°C before measurement. Plasma samples and reagents were mixed in a 96-well plate. The optical density (OD) at 340 nm was measured using Spectramax M5 Microplate Reader (Molecular Devices, CA, USA). The plasma ALT levels were calculated as following:  $ALT (U/L) = \Delta OD_{340}/min \times 1768$ .

**Immunoblotting Analysis**—Immunoblotting analysis was conducted as described previously (2, 5, 11, 12). Briefly, liver samples (100 mg) were homogenized in a lysis buffer (20 mM Tris-HCl at pH8.0, 150 mM NaCl, 1 mM EDTA, 1 mM EGTA, 1% NP-40, 1 mM sodium orthovanadate, 25 mM β-glycerolphosphate, 1 mM dithiothreitol, 1 mM phenylmethylsulfonyl fluoride, 2 βg/mL aprotinin, 2 βg/mL leupeptin, and 1 µg/mL pepstatin), and then lysates were sonicated to break the nuclear membrane. After incubation on ice for 1 h, the lysates were centrifuged at 13,000 rpm for 10 min at 4°C. Following centrifugation, the supernatant was transferred to a new tube, and protein concentration was measured using Bradford assays (Bio-Rad, Cat#5000201, CA, USA) according to manufacturer's instructions. Subsequently, protein samples were separated on 10% SDS-PAGE in a protein electrophoresis running buffer (Bio-Rad, Cat#1610772, CA, USA). Proteins were transferred onto PVDF membranes (Bio-Rad, Cat#1610771, CA, USA) in a Western blot transfer buffer (Bio-Rad, Cat#1610771, CA, USA) at 90V at 4°C for 2 h. After transfer, the PVDF membranes were washed with Tris-buffered saline with 0.1% Tween-20 (TBST) three times, each wash lasting 5 min. The membranes were incubated in Tris-buffered saline (TBST) containing 5% non-fat milk at room temperature for 1 h. After blocking, the PVDF membranes were briefly washed to remove any residual milk and stripped according to target protein's molecular weight. The protein membranes were incubated with a primary antibody in TBST with 3% BSA at 4°C with gentle agitation overnight. After PVDF membranes were washed in TBST 3 times, 5 min each time, the membranes were incubated in horseradish peroxidase-conjugated secondary antibody at room temperature for 1 h. Immunoblots were detected by using Clarity Western ECL Substrate or Clarity Max Western ECL Substrate (Bio-Rad, Cat#170-5061 or Cat#170-5062, CA, USA). Immunoblotting bands were visualized using ChemiDoc MP Imaging System (Bio-Rad, CA, USA). Band intensity was quantified by NIH Image J software. For phosphorylation, phosphorylation levels of SR proteins were quantified by densitometry,

normalized to those of GAPDH, and presented as the fold change relative to the control. For protein levels, the specific band intensity was quantified, normalized to those of GAPDH, and presented as the fold change relative to the control.

**The primary antibodies used** were as follows: SRPK2 (BD Transduction Laboratories #611118, 1:1000, CA, USA), phosphoepitope SR proteins (MilliporeSigma #MABE50, 1:2500, MA, USA), SRSF10 (Cell Signaling Technology, #42267, 1:1000, MA, USA), SREBP-1 (Santa Cruz #sc-13551, TX, USA 1:1000), FAS (BD Transduction Laboratories #610963, 1:10000), SCD1 (Cell Signaling Technology, #2794, 1:1000), Cleaved Caspase-3 (Cell Signaling Technology, #9661, 1:1000), Cleaved Caspase-1 p10 (Santa Cruz #514 1:1000), Cleaved Caspase-1 p20 (Cell Signaling Technology, #89332, 1:1000), and GAPDH (MilliporeSigma #MAB374, 1:5000), phospho-Thr389 S6K1 (CST#9234, 1:1000), S6K1 (CST#9202, 1:1000), phospho-Ser235/236S6 (CST#2211, 1:1000), S6 (CST#2212, 1:1000), phospho-Thr37/46 4E-BP1 (CST#9459, 1:1000), and 4E-BP1 (CST#9452, 1:1000).

**Liver Histology**—Hematoxylin& Eosin (H&E) staining was performed on liver tissue sections as described previously(2, 12, 13). Liver tissues were rapidly harvested and fixed in phosphate-buffered 10% formalin (Fisher Chemical, Cat#SF100-20, Cat#SF100-20, MA, USA) for 2 weeks at room temperature. Fixed liver tissues were then embedded in paraffin. Paraffin sections (4  $\mu$ m) were cut and mounted on glass slides. Paraffin-fixed liver sections were subjected to H&E staining. Staining images were captured and digitalized using a Nikon DS-Fi1 digital camera attached to the Nikon Eclipse 80i microscope.

**Immunohistochemistry**—Immunohistochemistry of liver sections was performed as described previously (2, 12, 13). Liver sections were deparaffinized and rehydrated. For antigen retrieval, liver sections were heated in 10 mM citric acid buffer (pH 6.0) using a microwave for 3 cycles: 5 mins for the first cycle and 2 mins for the remaining two cycles. After cooling to room temperature, the sections were incubated with 3% hydrogen peroxide solution containing 10% methanol for 10 min at 37°C to eliminate endogenous peroxidase activity. Then, sections were washed with ice-cold phosphate-buffered saline (PBS, pH 7.4) with 0.1% Tween-20 (PBST) 3 times, 5 mins each time. After wash, liver sections were blocked with 2.5% normal horse serum (ImmPRESS Horse Anti-Rabbit IgG Polymer Kit, Vector Laboratories, Cat#MP-7401, CA, USA). For primary antibody incubation, the liver sections were placed in a wet box and incubated with a primary antibody in PBST with 1% BSA at 4°C overnight. The next day, the primary antibodies were removed, and the sections were washed with ice-cold PBST 3 times, 5 mins each time. Subsequently, the sections were incubated at room temperature for 1 h with horse anti-rabbit IgG polymer peroxidase (ImmPRESS Horse Anti-Rabbit IgG Polymer Kit, Vector Laboratories, Cat#MP-7401) according to the manufacturer's instructions. The sections were washed with ice-cold PBST 3 times, 5 mins each time. For color development, the sections were incubated with DAB substrate reaction from the SignalStain® DAB Substrate Kit (Cell Signaling Technology, CST#8059, MA, USA) according to the manufacturer's instructions. Finally, the liver sections were counterstained with hematoxylin and cleared with xylene. After mounting, the positive stained liver sections were observed under a Nikon Eclipse 80i microscope. Staining images were captured and digitalized using a Nikon DS-Fi1 digital camera attached to the Nikon Eclipse 80i microscope.

**The primary antibodies used** were as follows: SRPK2 (ABclonal # A17536, 1:200, MA, USA), FAS (Cell Signaling Technology, #3180, 1:150), ACLY (Cell Signaling Technology, #13390, 1:600), SCD1 (Cell Signaling Technology, #2794, 1:100), and MPO (Biocare Medical #PP023AA, ready-to-use, CA, USA).

**Immunofluorescent staining**—AML12 hepatocytes were seeded on coverslips and fixed in 4% paraformaldehyde in PBS (pH 7.4) for 10 min at room temperature, and were washed with ice-cold PBST 3 times, 5 mins each time. After washing, cells were permeabilized with 0.1% Triton X-100 for 10 mins at room temperature. After washing with PBST 3 times, coverslips were blocked using 10% normal goat serum at room temperature for 1 h. The cell samples on coverslips were incubated with a primary antibody at 4°C overnight. The next day, the cell samples were washed with ice-cold PBST 3 times. After being washed, the cell samples on coverslips were incubated with a secondary antibody in darkness for 1 h. After a final wash with PBST, slides were mounted with ProLong™ Gold Antifade Mountant with DAPI (Invitrogen, Cat#P36935, MA, USA). The positive stained liver sections were observed under a Nikon Eclipse 80i microscope. The fluorescence images were taken under a Nikon Eclipse DS-Qi1MC Digital Camera attached to the Nikon Eclipse 80i microscope.

**The primary antibodies used** were as follows: SRPK2 (BD Transduction Laboratories, #611118, 1:100), and Texas-red dye-conjugated AffiniPure Goat-Anti-Mouse IgG (Jackson ImmunoResearch, Cat#115-076-062, 1:100, discontinued, PA, USA).

**Total RNA Extraction and Quantitative Reverse Transcription PCR (qRT-qPCR)**—Approximately 20 mg of liver tissue was used for total RNA extraction according to the TRIzol reagent's manufacture instructions (Invitrogen, Cat#15596026, MA, USA). Concentrations of total RNA were measured in a Spectramax M5 Microplate Reader (Molecular Devices, CA, USA). Total RNA (2500 ng) was used for single-strand cDNA synthesis using a High Capacity cDNA Reverse Transcription kit (Applied Biosystems, Cat#4368813, MA, USA) according to the manufacturer's instructions. The cDNA synthesis was carried out in a Bio-Rad T100 Thermal Cycler (Bio-Rad, Hercules, CA). For quantitative RT-PCR (qRT-PCR), SYBR Green PCR master mix (Thermo Fisher, #A25742, Waltham, MA,) and gene-specific primers were used in a 10  $\mu$ L reaction mix. The mRNA levels were quantified by real-time PCR analysis in the Bio-Rad CFX384 Touch Real-Time PCR Detection System (Bio-Rad, Hercules, CA). Quantitative analysis was performed using the  $\Delta\Delta C_t$  method. The relative mRNA levels of genes were normalized to those of GAPDH and expressed as relative levels to the control. The primers used for qRT-qPCR are presented in **Table S2**.

**Human Liver Tissue Samples**—Normal human liver samples (n =10) and alcoholic liver disease tissues (n =10) with steatosis, inflammation, and severe fibrosis (F3-4) were obtained from donor livers and recipient's livers, respectively, during liver transplantations from the Liver Tissue Procurement and Distribution System (LTPDS) at the University of Minnesota as described previously(2). Particularly, normal healthy liver samples were obtained from the part of donor livers that were not used for transplantation. Individuals with an alcohol-drinking history (2 to 3 drinks/day) and liver cancer were excluded from the study. Prior to this analysis, all normal controls and patient records were anonymized and de-identified. All snap-freezing liver samples were collected in liquid nitrogen and stored in a -80°C freezer.

**Statistical Analysis**—Data are presented as means  $\pm$  standard error. Using GraphPad Prism 6.0 software, results were analyzed by one-way ANOVA between multiple groups; and results were analyzed by a two-tailed Student's *t*-test between two groups.  $P < 0.05$  was considered statistically significant.

**Key Resources Table S1**

| <b>REAGENT or RESOURCE</b>                              | <b>SOURCE</b>                         | <b>IDENTIFIER</b>               |
|---------------------------------------------------------|---------------------------------------|---------------------------------|
| <b>Antibodies</b>                                       |                                       |                                 |
| Anti-SRPK2                                              | BD Transduction Laboratories          | Cat#611118; RRID: AB_398429     |
| Anti-SRPK2                                              | Abclonal                              | Cat#A17536; RRID:AB_2772388     |
| Anti-phosphoepitope SR proteins                         | MilliporeSigma                        | Cat#MABE50; RRID:AB_10807429    |
| Anti-FAS                                                | BD Transduction Laboratories          | Cat#610963; RRID:AB_398276      |
| Anti-SREBP1                                             | Santa Cruz                            | Cat#sc-13551; RRID:AB_628282    |
| Anti-SCD1                                               | Cell signaling technology             | Cat#2794; RRID:AB_2183099       |
| Anti-Cleaved Caspase-1 p10                              | Santa Cruz                            | Cat#514; RRID:AB_2068895        |
| Anti-Cleaved Caspase-1 p20                              | Cell signaling technology             | Cat#89332; RRID:AB_2923067      |
| Anti-Cleaved Caspase-3                                  | Cell signaling technology             | Cat#9661; RRID:AB_2341188       |
| Anti-SRSF10                                             | Cell signaling technology             | Cat#42267;                      |
| Anti-pS6K1 (T389)                                       | Cell signaling technology             | Cat#9234; RRID:AB_2269803       |
| Anti-S6K1                                               | Cell signaling technology             | Cat#9202; RRID:AB_331676        |
| Anti-pS6 (S235/236)                                     | Cell signaling technology             | Cat#2211; RRID:AB_331679        |
| Anti-S6                                                 | Cell signaling technology             | Cat#2217; RRID:AB_331355        |
| Anti-p4E-BP1 (T37/46)                                   | Cell signaling technology             | Cat#2855; RRID:AB_560835        |
| Anti-4E-BP1                                             | Cell signaling technology             | Cat#9644; RRID:AB_2097841       |
| HRP conjugated Goat anti Mouse IgG                      | Bio Rad                               | Cat#1706516; RRID:AB_11125547   |
| HRP conjugated Goat anti Rabbit IgG                     | Cell signaling technology             | Cat#7074 RRID:AB_2099233        |
| Texas-red dye-conjugated AffiniPure Goat-Anti-Mouse IgG | Jackson ImmunoResearch                | Cat#115-076-062                 |
| Anti-GAPDH                                              | MilliporeSigma                        | #MAB374; RRID:AB_2107445        |
|                                                         |                                       |                                 |
| <b>Bacterial and virus strains</b>                      |                                       |                                 |
| Ad-U6-m-SRPK2-shRNA (Mouse SRPK2 shRNA) NM_009274       | VECTOR BIOLABS                        | Cat# shADV-253411               |
| Ad-m-SRPK2 (Mouse SRPK2)                                | VECTOR BIOLABS                        | Cat# ADV-253411                 |
|                                                         |                                       |                                 |
| <b>Biological samples</b>                               |                                       |                                 |
| Human liver samples                                     | Liver Tissue Cell Distribution System | NIH Contract #HHSN276201200017C |
|                                                         |                                       |                                 |

| <b>Chemicals, peptides, and recombinant proteins</b> |                                     |                                                                                                         |
|------------------------------------------------------|-------------------------------------|---------------------------------------------------------------------------------------------------------|
| Dulbecco's Modified Eagle Media (DMEM)               | Gibco                               | Cat# 11965092                                                                                           |
| Ham's F-12 medium                                    | Hyclone                             | Cat#SH30026.01                                                                                          |
| Penicillin-Streptomycin                              | Gibco                               | Cat#15140-122                                                                                           |
| 0.25% Trypsin-EDTA                                   | Gibco                               | Cat#25200-056                                                                                           |
| Lipofectamine 3000                                   | Invitrogen                          | Cat#L3000-008                                                                                           |
| TRIzol                                               | ambion                              | Cat#15596026                                                                                            |
| High Capacity cDNA Reverse Transcription Kit         | appliedbiosystems                   | Cat#4368813                                                                                             |
| PowerUp SYBR Green Master Mix                        | appliedbiosystems                   | Cat#A25742                                                                                              |
| 30% Acrylamide/Bis Solution 29:1                     | Bio Rad                             | Cat#1610156                                                                                             |
| Protein Assay Dye Reagent Concentrate                | Bio Rad                             | Cat#5000006                                                                                             |
| Clarity Western ECL Substrate                        | Bio Rad                             | Cat#170-5061                                                                                            |
| Clarity Max Western ECL Substrate                    | Bio Rad                             | Cat#170-5062                                                                                            |
| ImmPRESS Horse Anti-Rabbit IgG Polymer Kit           | VECTOR LABORATORIES                 | Cat#MP-7401                                                                                             |
| DAB Substrate Kit                                    | Cell Signaling technology           | Cat#8059                                                                                                |
| Collagenase Type 2                                   | Worthington Biochemical Corporation | Cat#44N15257B                                                                                           |
| ProLong Gold antifade reagent with DAPI              | Invitrogen                          | Cat#36935                                                                                               |
| Rapamycin                                            | ALEXIS BIOCHEMICALS                 | Cat#380-001-M001                                                                                        |
| Cycloheximide                                        | ThermoFisher SCIENTIFIC             | Cat#J66665.03                                                                                           |
| <b>Critical commercial assays</b>                    |                                     |                                                                                                         |
| LIQUID ALT (SGPT) REAGENT SET                        | POINTE SCIENTIFIC                   | Cat#A7526-150                                                                                           |
| Infinity Triglycerides                               | Thermo SCIENTIFIC                   | Cat#TR22421                                                                                             |
| Infinity Cholesterol                                 | Thermo SCIENTIFIC                   | Cat#TR13421                                                                                             |
|                                                      |                                     |                                                                                                         |
| <b>Experimental models: Cell lines</b>               |                                     |                                                                                                         |
| AML12                                                | ATCC                                | CRL-2254                                                                                                |
| <b>Experimental models: Organisms/strains</b>        |                                     |                                                                                                         |
| Mouse: WT C57BL6/J                                   | Jackson Laboratories                | JAX: 000664                                                                                             |
| Mouse: FGF21 transgenic                              | Kharitonov et al. 2005              | DOI: 10.1172/JCI23606                                                                                   |
| Mouse: FGF21 knockout                                | Fisher et al. 2014                  | <a href="https://doi.org/10.1053/j.gastro.2014.07.044">https://doi.org/10.1053/j.gastro.2014.07.044</a> |
|                                                      |                                     |                                                                                                         |
| <b>Oligonucleotides</b>                              |                                     |                                                                                                         |
| qRT-PCR primers are shown in Table S1                | This study                          | N/A                                                                                                     |
| SRPK2 shRNA<br>GCAGAGAGTGATTACACGTAT                 | Vector BioLabs                      | Cat# shADV-253411                                                                                       |
|                                                      |                                     |                                                                                                         |
| <b>Recombinant DNA</b>                               |                                     |                                                                                                         |
| pSPORT-mSRPK2                                        | This paper                          | N/A                                                                                                     |
|                                                      |                                     |                                                                                                         |
| <b>Software and algorithms</b>                       |                                     |                                                                                                         |
| ImageJ                                               | NIH                                 | <a href="https://imagej.nih.gov/ij/">https://imagej.nih.gov/ij/</a>                                     |
| Prism                                                | GraphPad 6.0                        |                                                                                                         |
|                                                      |                                     |                                                                                                         |

| <b>Animal Diets</b>         |          |             |
|-----------------------------|----------|-------------|
| Lieber-DeCarli control diet | Bio-Serv | Cat#F1259SP |
| Lieber-DeCarli ethanol diet | Bio-Serv | Cat#F1258SP |

**Table. S2. List of primers used for quantitative real-time PCR and RT-PCR in our study.**

| <b>Gene Name</b>                           | <b>Accession No.</b> | <b>Primer Sequence Forward 5'-3'</b> | <b>Primer Sequence Reverse 5'-3'</b> |
|--------------------------------------------|----------------------|--------------------------------------|--------------------------------------|
| <b>Srebp1c</b>                             | NM_001358314.1       | GGAGCCATGGATTGCACATT                 | GGCCCCGGAAGTCACTGT                   |
| <b>Acly</b>                                | NM_001199296.1       | GCCAGCGGGAGCACATC                    | CTTTGCAGGTGCCACTTCATC                |
| <b>Acc1</b>                                | NM_133360.2          | CTCCTGCTGCGATTGCTACC                 | TCCACAGTCCCAGCACTCAC                 |
| <b>Fas</b>                                 | NM_007988.3          | GCTGCGGAACTTCAGGAAAT                 | AGAGACGTGTCACTCCTGGACTT              |
| <b>Elovl6</b>                              | NM_130450.2          | CCCGAACTAGGTGACACGAT                 | CCAGCGACCATGTCTTTGTA                 |
| <b>Scd1</b>                                | NM_009127.4          | GCCTGTACGGGATCATACTG                 | CAGCCGTGCCTTGTAAGTTC                 |
| <b>Dgat2</b>                               | NM_026384.3          | AGTGGCAATGCTATCATCATCGT              | TCTTCTGGACCCATCGGCCCCAGGA            |
| <b>Lipin 1</b>                             | NM_001355598.1       | CCCTCGATTTCAACGTACCC                 | GCAGCCTGTGGCAATTCA                   |
| <b>Lipin 1 isoform <math>\alpha</math></b> | NM_001130412.1       | GGTCCCCCAGCCCCAGTCCTT                | GCAGCCTGTGGCAATTCA                   |
| <b>Lipin 1 isoform <math>\beta</math></b>  | NM_001355598.1       | CAGCCTGGTAGATTGCCAGA                 | GCAGCCTGTGGCAATTCA                   |
| <b>Lipin 1 (RT-PCR)</b>                    | NM_001355598.1       | TCCAGTTCGGACAGAGAAT                  | GCCAGAGCATTTCAGGTTA                  |
| <b>Cxcl1</b>                               | NM_008176.3          | TCTCCGTTACTTGGGGAC                   | CCCACTCAAGAATGGTCGC                  |
| <b>Il-1<math>\beta</math></b>              | NM_008361.4          | TTCGTGAATGAGCAGACAGC                 | GGTTTCTTGACCCCTGAGC                  |
| <b>Tnf-<math>\alpha</math></b>             | NM_001278601.1       | CGTCAGCCGATTTGCTATCT                 | CGGACTCCGCAAAGTCTAAG                 |
| <b>Cd11b</b>                               | NM_001082960.1       | CTGCGAAGATCCTAGTTGTC                 | GGGACTGTGGTTTGTGAAG                  |
| <b>Mpo</b>                                 | NM_010824.2          | CCCTAGACCTGCTGAAGAG                  | GTGATGGTGCGATACTTGTC                 |
| <b>Ly6g</b>                                | NM_001310438.1       | TGCGTTGCTCTGGAGATAGA                 | CAGAGTAGTGGGGCAGATGG                 |
| <b>Srpk2</b>                               | NM_001359172.1       | AGAGCCAGAGGAGGAGATTC                 | CCAGCACAGCCATACAGTAG                 |
| <b>Srpk2</b>                               | NM_001359172.1       | GCAGCCGACTTAGAGGACAC                 | CCTTCTCCGCGTTCTCCTTC                 |
| <b>SRSF10</b>                              | NM_001080387.2       | TTCTACACTCGGCGTCCAAG                 | CAATCTGACGCCCACAAATC                 |
| <b>Gapdh</b>                               | NM_001289726.1       | TGCGACTTCAACAGCAACTC                 | CTTGCTCAGTGCCTTGCTG                  |
| <b>PKM</b>                                 | NM_001253883.2       | CACACAGATGCTGGAGAG                   | GCCAAGTTTACACGAAGG                   |
| <b>Atp8a1</b>                              | NM_001038999.2       | AAGGCTGATAATGCTGTGAAC                | TCGTAGAGATGTCGGTTTGG                 |
| <b>Immt</b>                                | NM_001253681.1       | CTGCCTGTGGCACAGAGCC                  | CAGTATGTTGGAGTGTG                    |

## References

1. Bertola A, Mathews S, Ki SH, Wang H, Gao B. Mouse model of chronic and binge ethanol feeding (the NIAAA model). *Nat Protoc* 2013;8:627-637.
2. Chen H, Shen F, Sherban A, Nocon A, Li Y, Wang H, Xu MJ, et al. DEP domain-containing mTOR-interacting protein suppresses lipogenesis and ameliorates hepatic steatosis and acute-on-chronic liver injury in alcoholic liver disease. *Hepatology* 2018;68:496-514.
3. Kharitonov A, Shiyanova TL, Koester A, Ford AM, Micanovic R, Galbreath EJ, Sandusky GE, et al. FGF-21 as a novel metabolic regulator. *J Clin Invest* 2005;115:1627-1635.
4. Fisher FM, Chui PC, Nasser IA, Popov Y, Cunniff JC, Lundasen T, Kharitonov A, et al. Fibroblast growth factor 21 limits lipotoxicity by promoting hepatic fatty acid activation in mice on methionine and choline-deficient diets. *Gastroenterology* 2014;147:1073-1083.e1076.
5. Li Y, Wong K, Giles A, Jiang J, Lee JW, Adams AC, Kharitonov A, et al. Hepatic SIRT1 attenuates hepatic steatosis and controls energy balance in mice by inducing fibroblast growth factor 21. *Gastroenterology* 2014;146:539-549 e537.
6. Cabral F, Miller CM, Kudrna KM, Hass BE, Daubendiek JG, Kellar BM, Harris EN. Purification of Hepatocytes and Sinusoidal Endothelial Cells from Mouse Liver Perfusion. *J Vis Exp* 2018.
7. Zhang Z, Qian Q, Li M, Shao F, Ding WX, Lira VA, Chen SX, et al. The unfolded protein response regulates hepatic autophagy by sXBP1-mediated activation of TFEB. *Autophagy* 2021;17:1841-1855.
8. Liu Y, Xu S, Liu Y, Gowda YKM, Miao J. Generation of Adenovirus for In Vitro and In Vivo Studies of Hepatocytes. *Methods Mol Biol* 2022;2455:343-358.
9. Li Y, McGreal S, Zhao J, Huang R, Zhou Y, Zhong H, Xia M, et al. A cell-based quantitative high-throughput image screening identified novel autophagy modulators. *Pharmacol Res* 2016;110:35-49.
10. Wang H, Ni HM, Chao X, Ma X, Rodriguez YA, Chavan H, Wang S, et al. Double deletion of PINK1 and Parkin impairs hepatic mitophagy and exacerbates acetaminophen-induced liver injury in mice. *Redox Biol* 2019;22:101148.
11. Hou X, Xu S, Maitland-Toolan KA, Sato K, Jiang B, Ido Y, Lan F, et al. SIRT1 regulates hepatocyte lipid metabolism through activating AMP-activated protein kinase. *J Biol Chem* 2008;283:20015-20026.
12. Li Y, Xu S, Mihaylova MM, Zheng B, Hou X, Jiang B, Park O, et al. AMPK phosphorylates and inhibits SREBP activity to attenuate hepatic steatosis and atherosclerosis in diet-induced insulin-resistant mice. *Cell Metab* 2011;13:376-388.
13. Li Y, Xu S, Giles A, Nakamura K, Lee JW, Hou X, Donmez G, et al. Hepatic overexpression of SIRT1 in mice attenuates endoplasmic reticulum stress and insulin resistance in the liver. *FASEB J* 2011;25:1664-1679.
